# Supplementary material
Source: Springer Nature journal article supplement (https://www.springermedizin.de/resource/supplementary/13229_2010_24_MOESM12_ESM.pdf/9676032)

A. B6

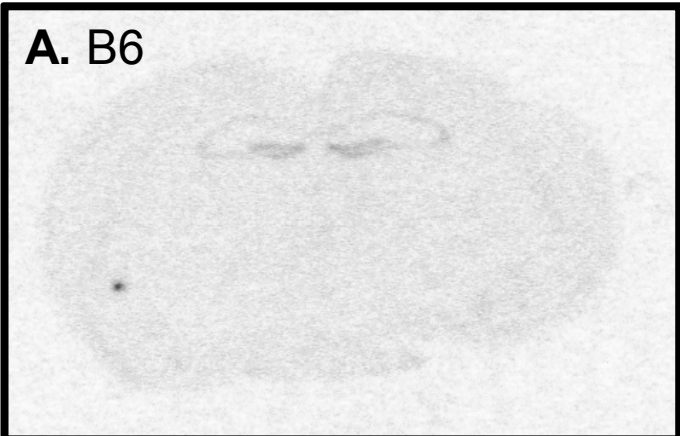

B. BTBR

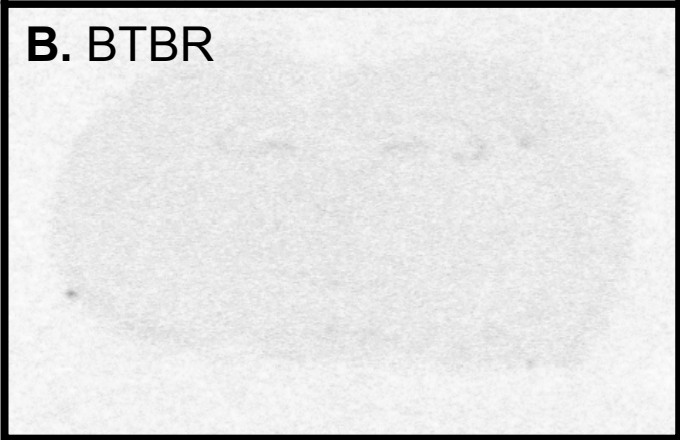

C.

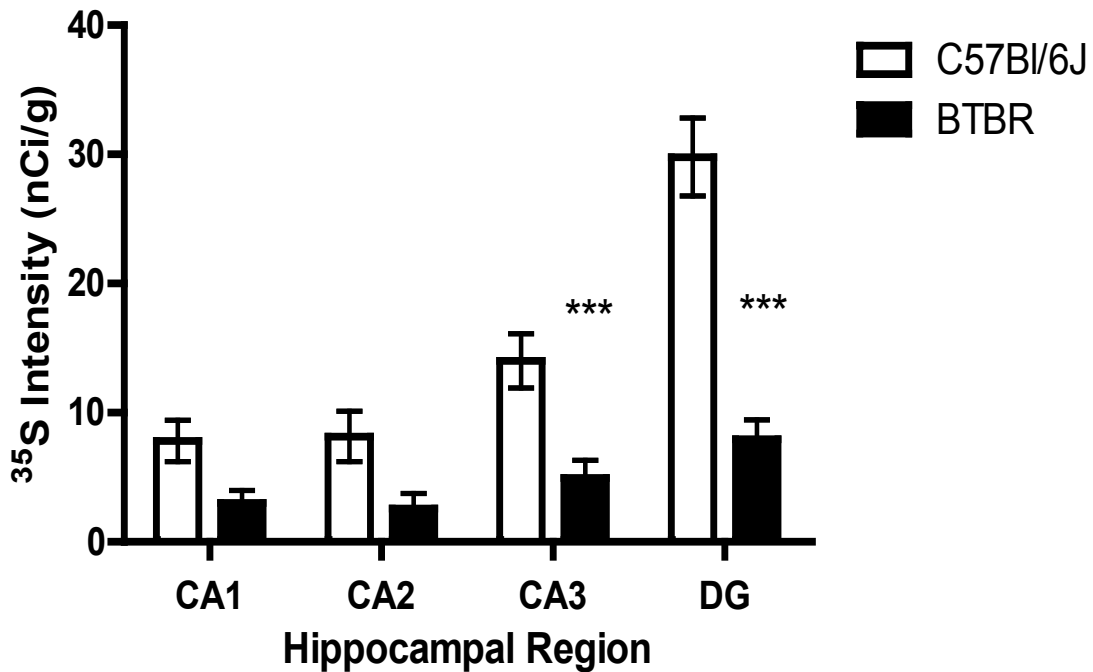

Supplement: MOESM12 [file 9676032]
